# Supplementary material for: Fast walking is a preventive factor against new-onset diabetes mellitus in a large cohort from a Japanese general population
Source: PubMed Central journal article supplement (PMC7804125; doi:10.1038/s41598-020-80572-y), 2021-01-12
Supplement: 41598_2020_80572_MOESM1_ESM.pdf [file 41598_2020_80572_MOESM1_ESM.pdf]

**Fast walking is a preventive factor against new-onset diabetes mellitus in a large cohort from a Japanese general population**

Mariko Iwasaki, Akihiro Kudo, Koichi Asahi, Noritaka Machii, Kunitoshi Iseki, Hiroaki Satoh, Toshiki Moriyama, Kunihiro Yamagata, Kazuhiko Tsuruya, Shouichi Fujimoto, Ichiei Narita, Tsuneo Konta, Masahide Kondo, Yugo Shibagaki, Masato Kasahara, Tsuyoshi Watanabe, and Michio Shimabukuro

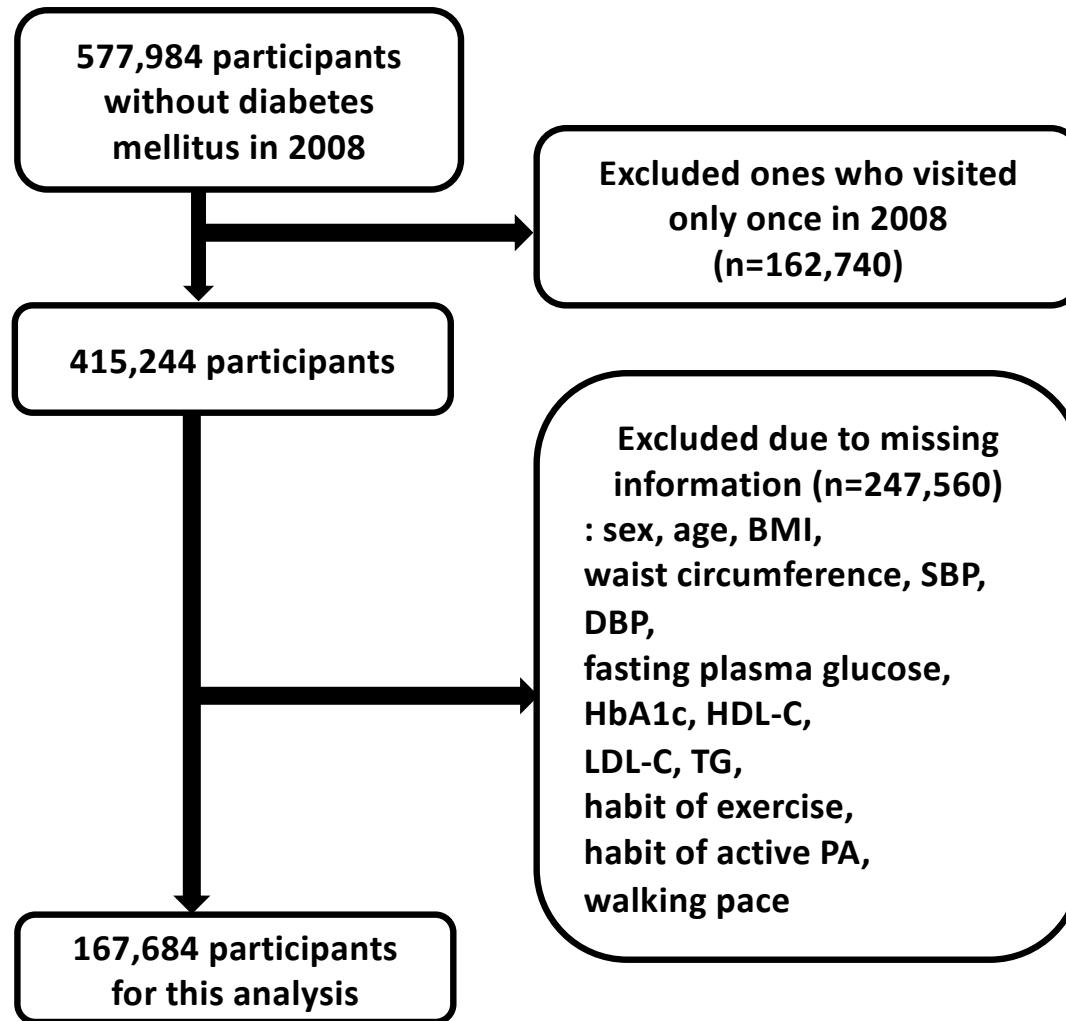

**Additional file 1. The flow chart of the participants' recruitment.**
