# Supplementary material for: Fast walking is a preventive factor against new-onset diabetes mellitus in a large cohort from a Japanese general population
Source: PubMed Central journal article supplement (PMC7804125; doi:10.1038/s41598-020-80572-y), 2021-01-12
Supplement: 41598_2020_80572_MOESM4_ESM.pdf [file 41598_2020_80572_MOESM4_ESM.pdf]

**Fast walking is a preventive factor against new-onset diabetes mellitus in a large cohort from a Japanese general population**

Mariko Iwasaki, Akihiro Kudo, Koichi Asahi, Noritaka Machii, Kunitoshi Iseki, Hiroaki Satoh, Toshiki Moriyama, Kunihiro Yamagata, Kazuhiko Tsuruya, Shouichi Fujimoto, Ichiei Narita, Tsuneo Konta, Masahide Kondo, Yugo Shibagaki, Masato Kasahara, Tsuyoshi Watanabe, and Michio Shimabukuro

**Additional File 4. Baseline characteristics of participants with or without exercise to sweat lightly**

|                                     | Walking>1 hour/day - | Walking>1 hour/day + | <i>P</i> |
|-------------------------------------|----------------------|----------------------|----------|
| n                                   | 80,179               | 87,505               |          |
| Age, years                          | 62.8(8.10)           | 64.5(7.3)            | <0.01    |
| Male, %                             | 36.6                 | 40.7                 | <0.01    |
| BMI, kg/m <sup>2</sup>              | 23.1(3.2)            | 22.9(3.0)            | <0.01    |
| Waist circumference, cm             | 83.6(9.1)            | 83.0(8.6)            | <0.01    |
| Systolic blood pressure, mmHg       | 128.6(17.4)          | 129.3(17.4)          | <0.01    |
| Diastolic blood pressure, mmHg      | 76.4(10.8)           | 76.3(10.6)           | <0.01    |
| Fasting plasma glucose, mg/dl       | 93.1 (9.7)           | 93.5(9.7)            | <0.01    |
| HbA1c, %                            | 5.58(0.33)           | 5.59(0.33)           | N.S.     |
| LDL cholesterol, mg/dL              | 127.2(29.9)          | 126.0 (29.5)         | <0.01    |
| HDL cholesterol, mg/dL              | 62.1(15.9)           | 63.3(16.0)           | <0.01    |
| Triglycerides, mg/dL                | 115.9(71.8)          | 109.6(67.3)          | <0.01    |
| AST, U/L                            | 23.9(9.4)            | 24.1(9.0)            | <0.01    |
| ALT, U/L                            | 21.6(13.1)           | 20.9(11.7)           | <0.01    |
| γGTP, U/L                           | 35.1(41.7)           | 33.5(39.4)           | <0.01    |
| Current smoker, %                   | 14.3                 | 11.9                 | <0.01    |
| Every day drinking, %               | 21.2                 | 22.9                 | <0.01    |
| Weight gain over 10kg from twenty,% | 32.6                 | 29.9                 | <0.01    |
| Weight change ± 3kg within 1year, % | 20.6                 | 19.2                 | <0.01    |

Mean (SD) or %, N.S. not significant
