# Supplementary material for: Fast walking is a preventive factor against new-onset diabetes mellitus in a large cohort from a Japanese general population
Source: PubMed Central journal article supplement (PMC7804125; doi:10.1038/s41598-020-80572-y), 2021-01-12
Supplement: 41598_2020_80572_MOESM6_ESM.pdf [file 41598_2020_80572_MOESM6_ESM.pdf]

**Fast walking is a preventive factor against new-onset diabetes mellitus in a large cohort from a Japanese general population**

Mariko Iwasaki, Akihiro Kudo, Koichi Asahi, Noritaka Machii, Kunitoshi Iseki, Hiroaki Satoh, Toshiki Moriyama, Kunihiro Yamagata, Kazuhiko Tsuruya, Shouichi Fujimoto, Ichiei Narita, Tsuneo Konta, Masahide Kondo, Yugo Shibagaki, Masato Kasahara, Tsuyoshi Watanabe, and Michio Shimabukuro

**Additional File 6. Multivariable-adjusted odds ratio for the risk of new-onset diabetes mellitus of fast walking**

|              | Weight gain over 10kg from twenty |          |                  |          | Weight change $\pm$ 3kg within 1year |          |                  |          |
|--------------|-----------------------------------|----------|------------------|----------|--------------------------------------|----------|------------------|----------|
|              | -                                 |          | +                |          | -                                    |          | +                |          |
|              | OR* (95% CI)                      | <i>P</i> | OR* (95% CI)     | <i>P</i> | OR* (95% CI)                         | <i>P</i> | OR* (95% CI)     | <i>P</i> |
| Fast walking | 0.91 (0.85-0.99)                  | <0.05    | 0.90 (0.83-0.98) | <0.05    | 0.90 (0.85-0.96)                     | <0.05    | 0.92 (0.83-1.03) | 0.16     |

\*Adjusted for sex, age, BMI, SBP, FPG, exercise to sweat lightly, walking>1 hour/day
